# Supplementary material for: Linc01133 contributes to gastric cancer growth by enhancing YES1-dependent YAP1 nuclear translocation via sponging miR-145-5p
Source: PubMed Central journal article supplement (PMC8752595; doi:10.1038/s41419-022-04500-w), 2022-01-11
Supplement: 41419_2022_4500_MOESM2_ESM.pdf [file 41419_2022_4500_MOESM2_ESM.pdf]

Re: Autho list change

昨天晚上9:57

Dear Professor Gao,

I agree to the author list change.  
Thank you!

Yujing Sun

 **Yujing Sun**

邮箱: [candysyj4@163.com](mailto:candysyj4@163.com)

--- Replied Message ---

From: 高鹏 <[gaopeng@sdu.edu.cn](mailto:gaopeng@sdu.edu.cn)>  
Date: 12/08/2021 21:51  
To: [yujing\\_sun@candysyj4@163.com](mailto:yujing_sun@candysyj4@163.com)  
Subject: Autho list change

Dear Dr.Sun,

For the article "Linc01133 contributes to gastric cancer growth by enhancing YES1-dependent YAP1 nuclear translocation via sponging miR-145-5p", which We have submitted to the journal "Cell death and disease",

回复: Autho list change

昨天晚上10:10

Dear Professor Gao,

Thank you for the information about the change of authors. I agree with adding Wen-jie Zhu to the list of authors.  
Best wishes and good night!  
Tian Yuan

----- 原始邮件 -----

发件人: "高鹏" <[gaopeng@sdu.edu.cn](mailto:gaopeng@sdu.edu.cn)>;  
发送时间: 2021年12月8日(星期三) 晚上9:53  
收件人: "Helium" <[2965188722@qq.com](mailto:2965188722@qq.com)>;  
主题: Autho list change

Dear Dr.Tian,

For the article "Linc01133 contributes to gastric cancer growth by enhancing YES1-dependent YAP1 nuclear translocation via sponging miR-145-5p", which We have submitted to the journal "Cell death and disease",

we added Wen-jie Zhu as the new co-author.

The new author list is :

Yujing Sun, Yuan Tian, Junyi He, Yaru Tian, Guohao

回复: Autho list change

昨天晚上10:09

I agree to this change.  
发自我的华为手机

----- 原始邮件 -----

发件人: 高鹏 <[gaopeng@sdu.edu.cn](mailto:gaopeng@sdu.edu.cn)>  
日期: 2021年12月8日周三 晚上9:54  
收件人: [hjy\\_008@126.com](mailto:hjy_008@126.com)  
主题: Autho list change

Dear Dr.He,

For the article "Linc01133 contributes to gastric cancer growth by enhancing YES1-dependent YAP1 nuclear translocation via sponging miR-145-5p", which We have submitted to the journal "Cell death and disease",

we added Wen-jie Zhu as the new co-author.

The new author list is :

Yujing Sun, Yuan Tian, Junyi He, Yaru Tian, Guohao Zhang, Ruinan Zhao, Wen-jie Zhu, Peng Gao

Please reply to this email to confirm your agreement to this change.

Re: Autho list change

昨天晚上10:02

Dear Dr.Gao,

I confirm that I agree to the author list change.

Sincerely!  
Yaru Tian

On 12/8/2021 21:53, 高鹏 <[gaopeng@sdu.edu.cn](mailto:gaopeng@sdu.edu.cn)> wrote:

Dear Dr.Tian,

For the article "Linc01133 contributes to gastric cancer growth by enhancing YES1-dependent YAP1 nuclear translocation via sponging miR-145-5p", which We have submitted to the journal "Cell death and disease",

we added Wen-jie Zhu as the new co-author.

The new author list is :

Yujing Sun, Yuan Tian, Junyi He, Yaru Tian, Guohao

Re: Autho list change

昨天晚上10:05

Agree with the author listing order.

---Original---

From: "高鹏" <[gaopeng@sdu.edu.cn](mailto:gaopeng@sdu.edu.cn)>  
Date: Wed, Dec 8, 2021 21:55 PM  
To: "623092550" <[623092550@qq.com](mailto:623092550@qq.com)>;  
Subject: Autho list change

Dear Dr.Zhang,

For the article "Linc01133 contributes to gastric cancer growth by enhancing YES1-dependent YAP1 nuclear translocation via sponging miR-145-5p", which We have submitted to the journal "Cell death and disease",

we added Wen-jie Zhu as the new co-author.

The new author list is :

Yujing Sun, Yuan Tian, Junyi He, Yaru Tian, Guohao Zhang, Ruinan Zhao, Wen-jie Zhu, Peng Gao

Please reply to this email to confirm your agreement to this change.

Re: Autho list change

昨天晚上10:09

I agree with this change

发自我的iPhone

----- Original -----

From: 高鹏 <[gaopeng@sdu.edu.cn](mailto:gaopeng@sdu.edu.cn)>  
Date: Wed, Dec 8, 2021 9:56 PM  
To: 赵瑞勇 <[231648042@qq.com](mailto:231648042@qq.com)>  
Subject: Re: Autho list change

Dear Dr.Zhao,

For the article "Linc01133 contributes to gastric cancer growth by enhancing YES1-dependent YAP1 nuclear translocation via sponging miR-145-5p", which We have submitted to the journal "Cell death and disease",

we added Wen-jie Zhu as the new co-author.

The new author list is :

Yujing Sun, Yuan Tian, Junyi He, Yaru Tian, Guohao Zhang, Ruinan Zhao, Wen-jie Zhu, Peng Gao

Re: Autho list change

昨天晚上10:03

I agree to this change

 **朱朱**

邮箱: [15266203531@163.com](mailto:15266203531@163.com)

签名由 网易邮箱大师 定制

On 12/08/2021 21:56, 高鹏 wrote:

Dear Dr.Zhu,

For the article "Linc01133 contributes to gastric cancer growth by enhancing YES1-dependent YAP1 nuclear translocation via sponging miR-145-5p", which We have submitted to the journal "Cell death and disease",

we added Wen-jie Zhu as the new co-author.

The new author list is :

Yujing Sun, Yuan Tian, Junyi He, Yaru Tian, Guohao Zhang, Ruinan Zhao, Wen-jie Zhu, Peng Gao
